# Supplementary material for: Comparative quality assessment of the drinkability of abandoned lake water with ground and municipal water in Raichur, Karnataka, India
Source: Research Square preprint supplement (doi:10.21203/rs.3.rs-6166744/v1), 2025-03-11
Supplement: Supplementary file 1 [file 540269e5e15e6aed597186bf.docx]

**Supplementary data**

Table S1. Standard deviation and Z scores for the water quality parameters obtained from Proficiency test conducted by NABL accredited Laboratories in the year 2022, 2023 and 2024

Global PT Provider Pvt Ltd, New Delhi, 2024

| **Sl.No.** | PT Parameter | Lab’s Result | Assigned Value (xpt) | Standard Deviation for Proficiency  Assessment (σpt) | Robust  ‘Z’ Score |
| --- | --- | --- | --- | --- | --- |
| **AVG** |
| 1. | pH @ 270C | **4.59** | **4.62** | **0.0675** | **-0.40** |
| 2. | Total Hardness (as CaCO3), mg/l | **134** | **133** | **6.77** | **0.14** |
| 3. | Total Dissolved Solids, mg/l | **186** | **166** | **20.3** | **0.94** |
| 4. | Chloride (as Cl), mg/l | **19.99** | **23.1** | **2.41** | **-1.22** |
| 5. | Sulphate (as SO4), mg/l | **81.73** | **79** | **12** | **0.21** |
| 6. | Calcium (as Ca), mg/l | **21.38** | **22.68** | **1.18** | **-1.05** |
| 7. | Total Alkalinity as CaCO3, mg/L | **6.7** | **6.3** | **1.03** | **0.37** |
| 8. | Fluoride (as F), mg/L | **11.28** | **11.57** | **2.13** | **-0.13** |
| 9. | Conductivity@ 25oC,µS/cm | **138** | **159** | **17.6** | **-1.13** |
| 10. | Turbidity, NTU | **6.69** | **6.14** | **0.776** | **0.67** |

| Aashvi Proficiency Testing & Analytical Service, Hyderabad,2023 | | | | | |
| --- | --- | --- | --- | --- | --- |
| 1. | pH @ 25oC | 7.99 | **7. 97** | **0.247** | **0.08** |
| 2. | Conductivity@ 25oC,µS/cm | 1080 | **1033.98** | **88.92** | **0.52** |
| 3. | Total Alkalinity as CaCO3, mg/L | 155 | **167.50** | **11.72** | **-1.07** |
| 4. | Total Hardness (as CaCO3), mg/L | **90.00** | **91.02** | **9.557** | **-0.11** |
| 5. | Total Dissolved Solids, mg/L | **622** | **625.61** | **64.438** | **-0.06** |
| 6. | Magnesium hardness, mg/L | **13.20** | **9.39** | **2.348** | **1.62** |
| 7. | Sulphate (as SO4), mg/L | **101.30** | **99.95** | **14.99** | **0.09** |
| 8. | Chloride (as Cl), mg/L | **176.29** | **172.53** | **10.352** | **0.36** |
| 9. | Fluoride (as F), mg/L | **1.76** | **1.47** | **0.221** | **1.31** |

| Global PT Provider Pvt. Ltd, New Delhi , 2022 | | | | | |
| --- | --- | --- | --- | --- | --- |
| **Sl. No.** | PT Parameter | Lab’s Result | Assigned Value (xpt) | Standard Deviation for Proficiency  Assessment (σpt) | Robust  ‘Z’ Score |
| **AVG** |
| 1. | pH @ 270C | 6.96 | **6.73** | **11.70** | **1.05** |
| 2. | Total Hardness (as CaCO3), mg/l | **157** | **172** | **22** | **-0.65** |
| 3. | Total Dissolved Solids, mg/l | **354** | **313** | **46** | **0.82** |
| 4. | Chloride (as Cl), mg/l | **23.49** | **30.50** | **5.68** | **-1.16** |
| 5. | Sulphate (as SO4), mg/l | **83.80** | **85.88** | **8.55** | **-0.23** |
| 6. | Calcium (as Ca), mg/l | **20.05** | **26.15** | **5.50** | **-1.04** |

Table S2. **Measurement of Uncertainty for parameters analysed in Drinking Water, surface water and groundwater.**

| **Sl.No.** | **Specific parameters performed** | **Test Method / Standard against**  **which tests are performed** | **Range of Testing**  **(mg/L)** | **Uncertainty of Measurement**  **(±) at Value (mg/L)** |
| --- | --- | --- | --- | --- |
|  | Calcium | EDTA titrimetric method  IS 3025 (Part 40):1991 R.A-2019 | 1.6 - 500 mg/L | ± 1.54 @ 40.35 mg/L |
|  | Chloride as Cl- | Argentometric method  IS 3025(part 32) -1988, RA 2019 | 2 to 1000 mg/L | ± 1.33 @ 37.21 mg/L |
|  | Color | Platinum Cobalt Visual Comparison method  IS 3025 (Part 4): 2021 | 5 to 500 Hazen units | ±0.85 @ 3.33 Hazen units |
|  | Fluoride as F- | SPADNS Method  APHA 4500 F- D, 23rd Edtn.2017 | 0.1 to 5mg/L | ± 0.05 @ 0.44 mg/L |
|  | Free Residual chlorine | Iodometric method  IS 3025 (Part 26): 2021 | 1 to 5 mg/L | ± 1.095 @ 64.16 mg/L |
|  | Magnesium | Calculation method  APHA 3500 F- B, 23rd Edtn-2017 | 1 to 500 mg/L | ± 0.75 @ 17.30 mg/L |
|  | Nitrate as NO3 | Chromotropic acid method  IS 3025 Part 34: 2022 | 5 to 25 mg/L | ± 0.25 @ 3.36 mg/L |
|  | pH | Electrometric Method  IS 3025 Part 11 : 2022 | 2.0 to 12.0 | ± 0.18 @ 7.26 pH value |
|  | Sulphate as SO4 | Turbidity method  IS 3025 Part 24/Sec 1:2022- | 1 to 500 mg/L | ±0.86 @ 20.92 mg/L |
|  | Total Alkalinity as CaCO3 | Indicator method  IS 3025(part 23) -1986, RA 2019 | 5 to 1000 mg/L | ± 2.36 @ 106.11 mg/L |
|  | Total Dissolved solids | Gravimetric method  IS 3025 part-16: 1984 RA 2012 | 10 to 2000 mg/L | ± 6.68 @ 243.00 mg/L |
|  | Total Hardness as CaCO3 | IS 3025 (Part 21)R.A- 2019 Titrimetric | 4 to 2000 mg/L | ± 2.07 @ 111.61 mg/L |
|  | Turbidity | IS 3025 (Part 10) 1984, R.A-2012 | 0.1 to 400 NTU | ± 0.025@ 0.15 NTU |
|  | DO | Winkler method | 1-10 mg/L | ± 0.5 @ 50.0 mg/L |
|  | BOD | Titrimetric method | 2-9 mg/L | ± 1.05 @ 70.00 mg/L |
|  | COD | Titrimetric method | 20-200mg/L | ± 0.95 @ 20.50 mg/L |

Table S3 List of samples collected from locations of Raichur district

| S.No | Source of Municipality water sample | Sample code | Location |
| --- | --- | --- | --- |
|  | MRS colony | DW1 | Raichur |
|  | Railway KSN | DW2 | Raichur |
|  | Railway RC | DW3 | Raichur |
|  | Devara colony | DW4 | Raichur |
|  | Sedam | DW5 | Raichur |

| S.No | Source of Ground water sample | Sample code | Location |
| --- | --- | --- | --- |
|  | MRS colony | GW1 | Raichur |
|  | Vijay NGO COLONY | GW2 | Raichur |
|  | Bahubali S1 bore Yadgir | GW3 | Raichur |
|  | Bahubali S2 bore Yadgir | GW4 | Raichur |
|  | Zindavali LBS Nagar | GW5 | Raichur |
|  | Suryakanth Krishna devaraya colony | GW6 | Raichur |
|  | Hanumanthu Beroon Quilla | GW7 | Raichur |
|  | Bharathi colony | GW8 | Raichur |
|  | Nijalingappa colony near water tank | GW9 | Raichur |
|  | Rampur | GW10 | Raichur |
|  | Askihal | GW11 | Raichur |
|  | Nijalingappa colony | GW12 | Raichur |
|  | Sharanama sindhanur | GW13 | Sindanur |
|  | SannaKantha sindhanur | GW14 | Sindanur |
|  | K.V.Venkatesh Kallur | GW15 | Kallur |
|  | K.Banadesh Devadurga | GW16 | Devdurga |

| S.No | Source of Surface water sample | Sample code | Place |
| --- | --- | --- | --- |
|  | UsukuHanumappa | SW1 | Raichur |
|  | Nerbavikunta | SW2 | Raichur |
|  | Aamthalab | SW3 | Raichur |
|  | Khakina | SW4 | Raichur |
|  | Jadarapete | SW5 | Mudgal |
|  | Halepete | SW6 | Mudgal |
|  | Nelhal | SW7 | Raichur |
|  | Dinni | SW8 | Raichur |
|  | Hunasihal | SW9 | Raichur |
|  | Sri Ram Nagar | SW10 | Raichur |
|  | Rampur | SW11 | Raichur |

| Characteristic (mg/L) | Acceptable limit* | Raichur district | | |
| --- | --- | --- | --- | --- |
| Lake water | Ground water | Municipality water |
|  |  |  |  |  |
| pH | 6.5–8.5 | 7.1–-8.8 | 7.0–7.9 | 7.1–7.5 |
| TDS | 500 | 14.9–129 | 330–**8724.0** | 36.0–891.0 |
| Turbidity, NT Units  Calcium (Ca+2) | 1.0  75 | **10.0–20.0**  27.0–**121.0** | 1.0–2.0  1.6–**527.0** | 1.0–**7.0**  12.83–**137** |
| Chloride (Cl- ) | 250 | 13.3–**229.0** | 25.3–**366.0** | 17.09–88.0 |
| Fluoride(F-) | 1.0 | 0.16– 0.89 | 0.3–**3.9** | 0.1–**1.8** |
| Magnesium (Mg+2) | 30 | 12.2–**68.1** | 1.1–**241.**0 | 2.0–**56.6** |
| Nitrite(NO3-) | 45 | 0.1–5.8 | 0.1–**80.0** | 3.1–19.8 |
| Sulphate(SO4-2) | 200 | 15.1–190.9 | 7.6–**440.0** | 8.1–171.0 |
| Total alkalinity (CaCO3) | 200 | 77.3–**401.0** | 62–**1518.0** | 24.5–**370.0** |
| Total hardness (CaCO3) | 200 | 8.94–43.0 | 10.0 –587.0 | 18.9–340.0 |
| Free residual chlorine( Cl2) | 0.2 | - | - | 0.2–8.0 |
| Biochemical oxygen demand (BOD) | 30 | 9.1–33.1 | - | - |
| Dissolved oxygen (DO) | 6 | **12.1–200.0** | - | - |
